# Supplementary material for: A multi-input light-stimulated synaptic transistor for complex neuromorphic computing
Source: Royal Society of Chemistry journal article supplement (doi:10.1039/c9tc03898a), 2019-01-01
Supplement: c9tc03898a1.pdf [file c9tc03898a1.pdf]

## Supplementary Information

### Multi-input Light-stimulated Synaptic Transistor for Complex Neuromorphic Computing

*Weixin He, Yuan Fang, Huihuang Yang, Xiaomin Wu, Lihua He, Huipeng Chen\*, Tailiang Guo*

Institute of Optoelectronic Display, National & Local United Engineering Lab of Flat Panel Display Technology, Fuzhou University, Fuzhou 350002, China

Email: [hpchen@fzu.edu.cn](mailto:hpchen@fzu.edu.cn)

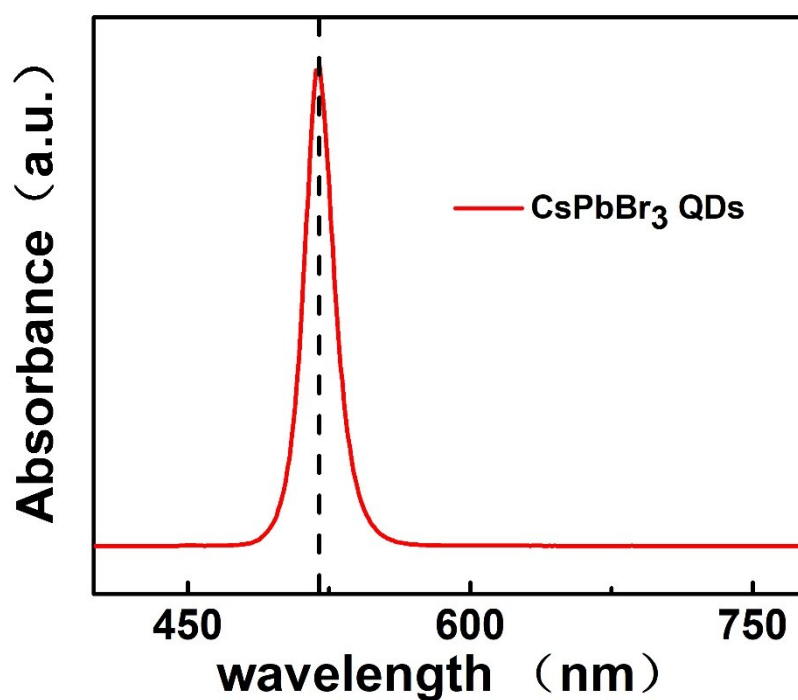

**Figure S1.** Photoluminescence (PL) spectrum of CsPbBr<sub>3</sub> QDs.

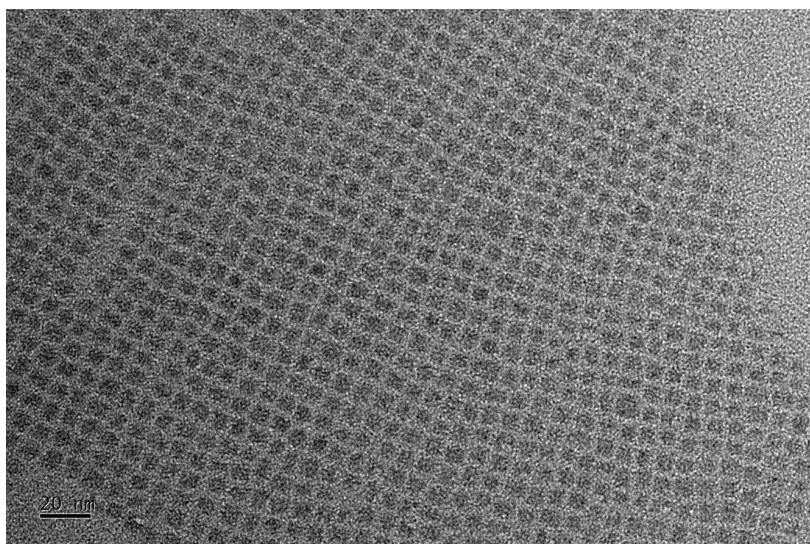

**Figure S2.** TEM image of the CsPbBr<sub>3</sub> QDs.

a)

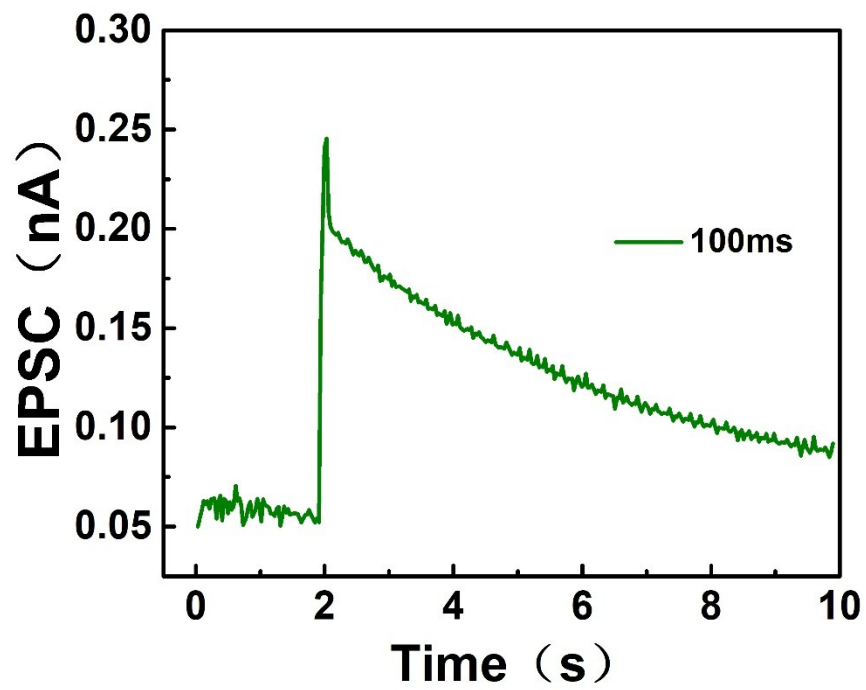

b)

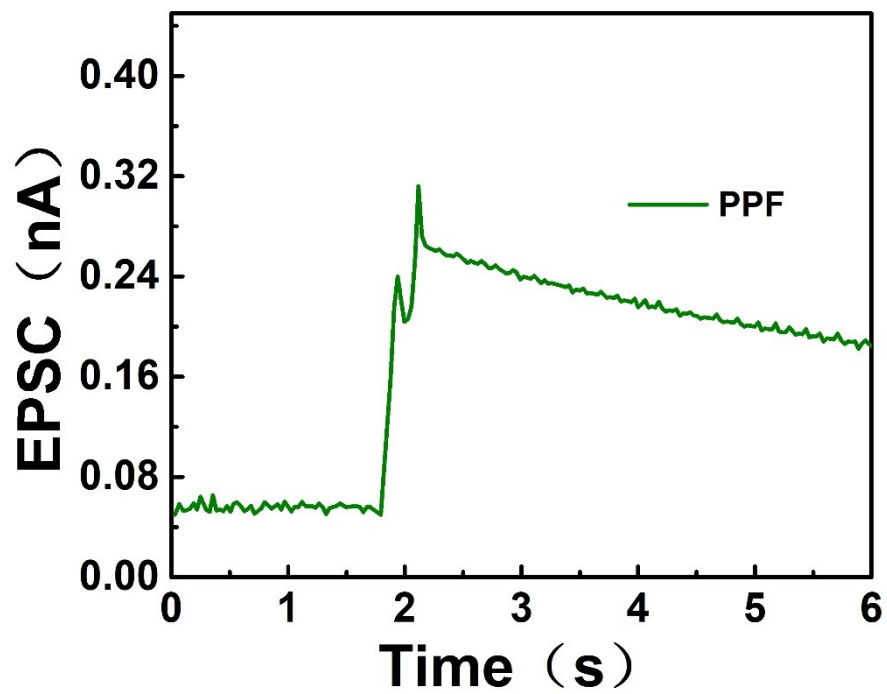

c)

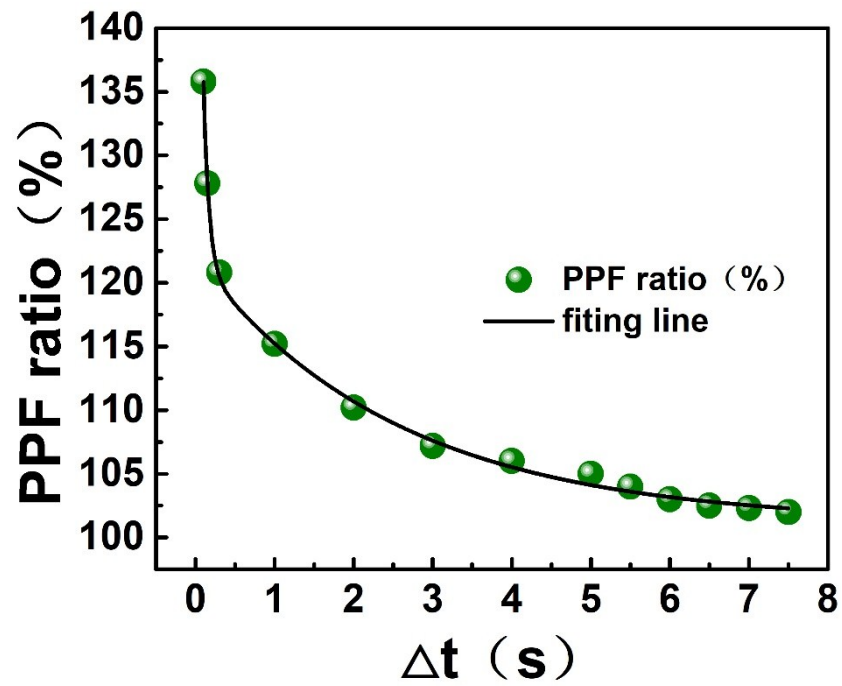

**Figure S3.** a) A typical EPSC triggered by a G3/G4 spike (500nm, 100 uW, 100ms). b) EPSCs stimulated by two successive G3/G4 spikes (500nm, 100 uW, time interval = 100ms), illustrating a PPF behavior. c) PPF index measured at different time intervals. The black curve is the exponentially fitting result.

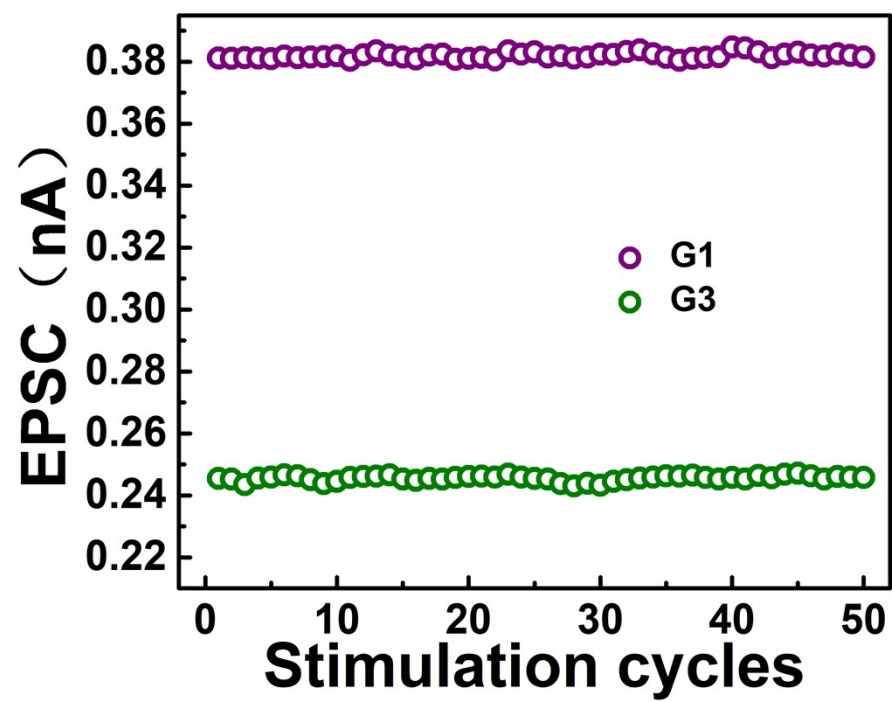

**Figure S4.** EPSCs within 50 stimulated spikes cycle of G1 and G3.

a)

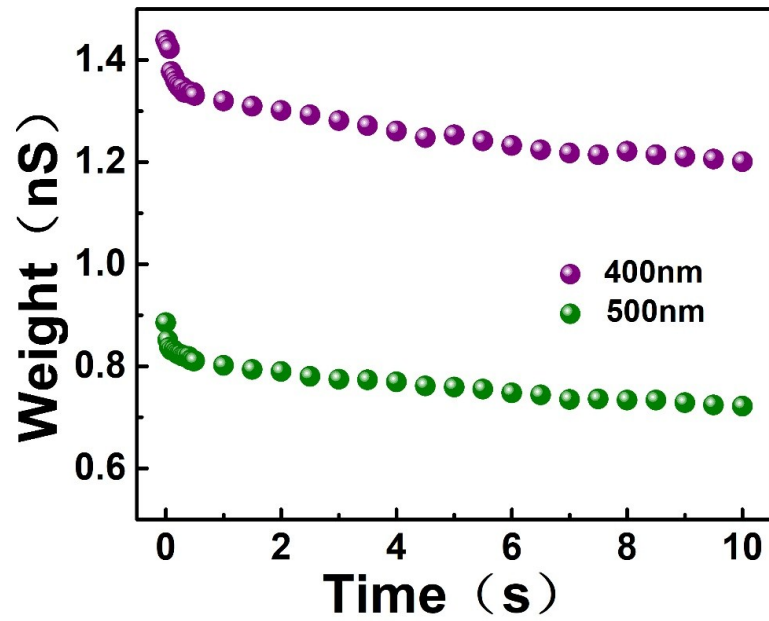

b)

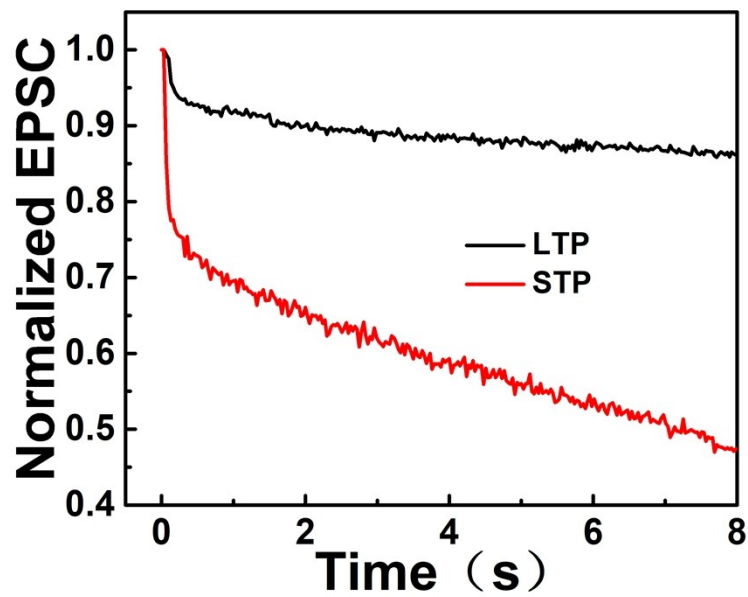

**Figure S5.** a) Weight changes after 20 G1/G2 spikes (purple points) and 20 G3/G4 spikes (green points). b) The normalized EPSC decay of STP (a G1 spike stimulation) and LTP (twenty succeeding G1 spikes stimulation) behaviors.

a)

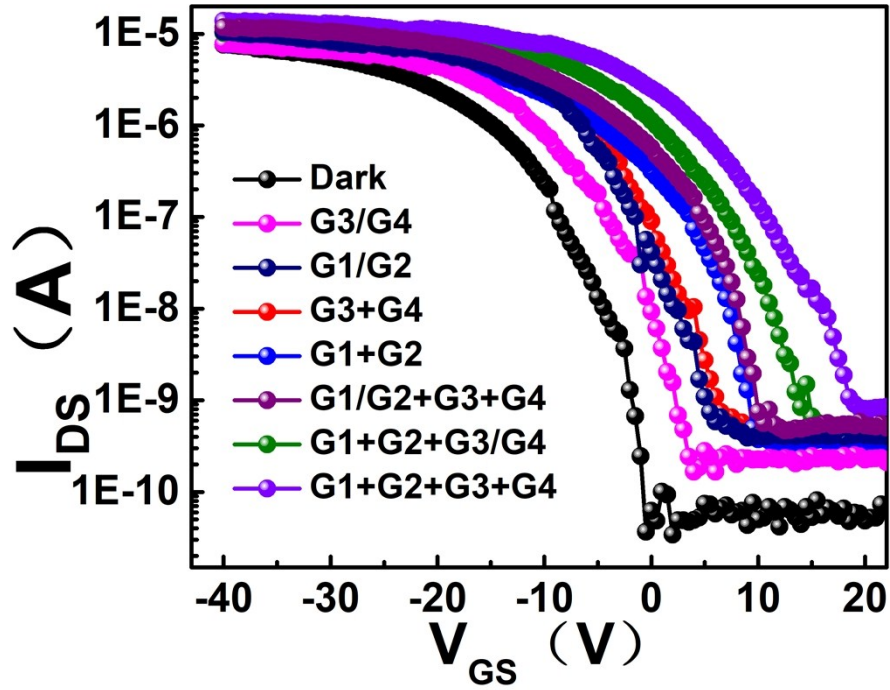

b)

| OR |   |   |           | AND |   |   |           |
|----|---|---|-----------|-----|---|---|-----------|
| I  | I | O | EPSC (nA) | I   | I | O | EPSC (nA) |
| 1  | 0 | 1 | 0.285     | 1   | 0 | 0 | 0.164     |
| 0  | 1 | 1 | 0.285     | 0   | 1 | 0 | 0.164     |
| 1  | 1 | 1 | 0.536     | 1   | 1 | 1 | 0.294     |
| 0  | 0 | 0 | 0.05      | 0   | 0 | 0 | 0.05      |

**Threshold = 0.24 nA**

**Figure S6.** a) The transfer characteristic curves of the transistor under different light inputs

with  $V_{DS} = -40V$ . b) A logical table corresponded to logic functions in Figure 3e.

a)

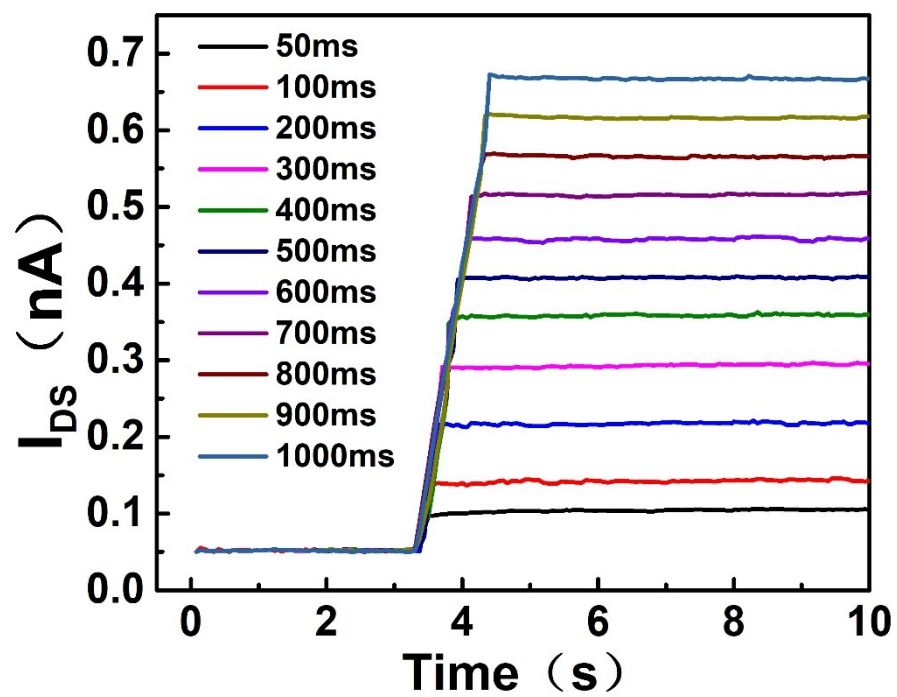

b)

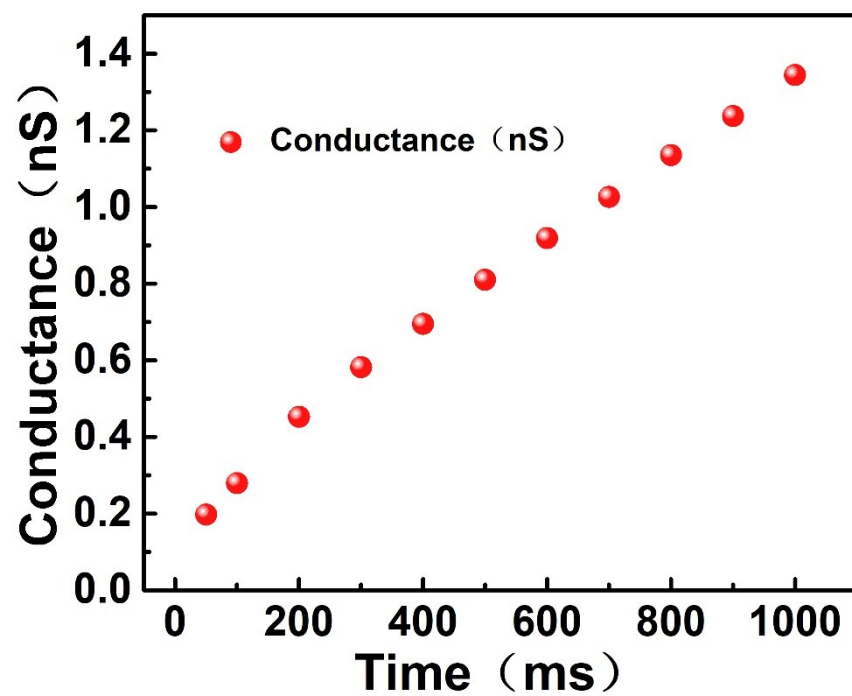



c)

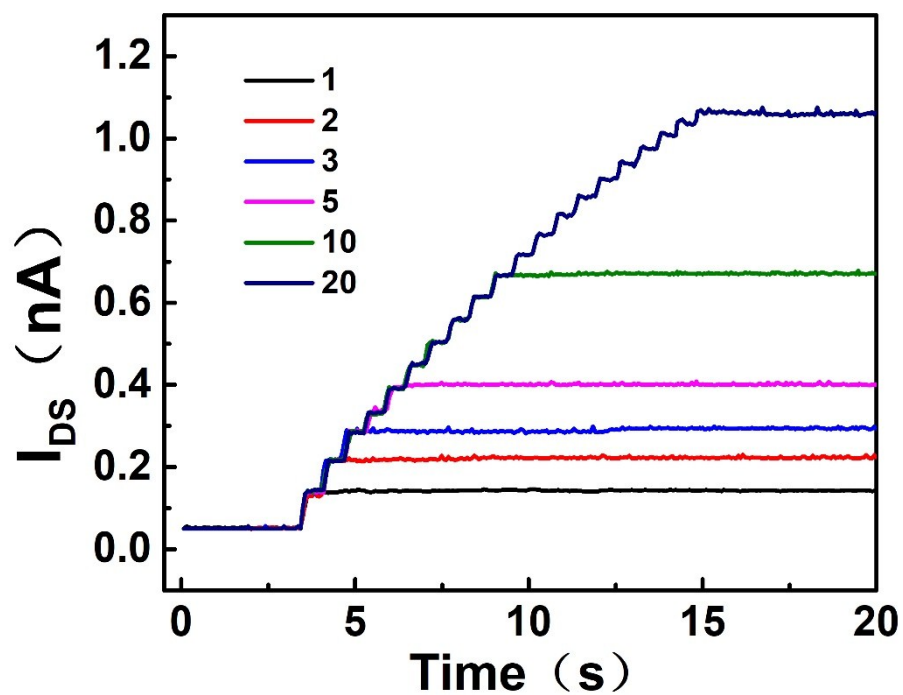

d)

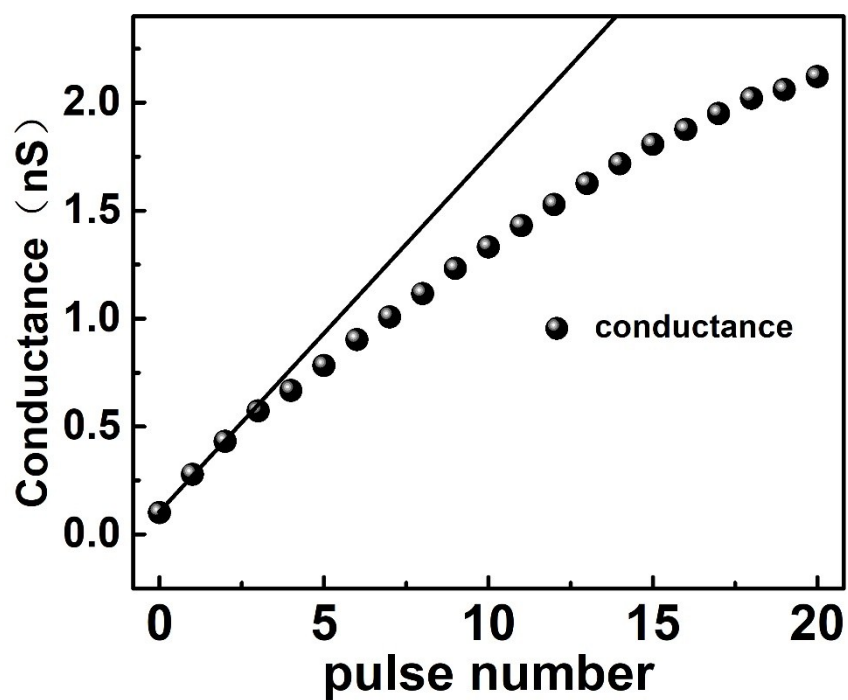

**Figure S7.** a)  $I_{DS}$  triggered by light spike illuminations (650 nm, 100 uW) with different light spike duration time. b) Channel conductance variation under a series of light spike (650 nm, 100 uW) with different light spike duration time. c)  $I_{DS}$  by applying different number of light

spikes from 1 to 20 (650 nm, 100 uW, duration time = 100 ms, interval time = 500 ms). d)  $I_{DS}$  variation with the increment of pulse number from 1 to 20.

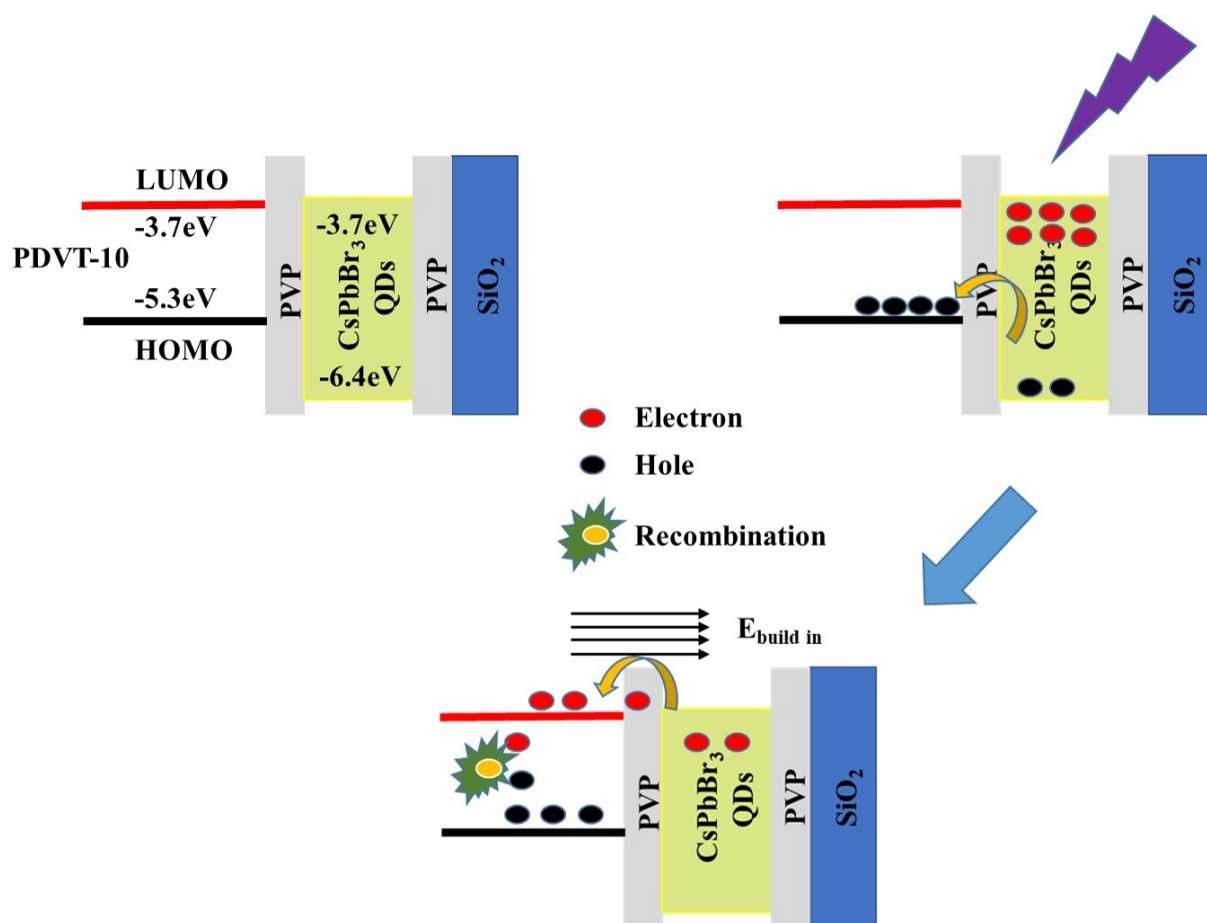

**Figure S8.** Schematic diagram of photogenerated carrier migration under and after light illumination (400 nm or 500 nm).
